# Supplementary material for: Synergistic impact of nano-supramolecular coordination polymer based on cadmium, ethyl nicotinate and thiocyanate ligands as efficient catalyst to remove harmful elements from wastewater
Source: Royal Society of Chemistry journal article supplement (doi:10.1039/d4ra05068a), 2024-01-01
Supplement: d4ra05068a1.pdf [file d4ra05068a1.pdf]

## Synergistic impact of nano-supramolecular coordination polymer based on cadmium, ethyl nicotinate and thiocyanate ligands as efficient catalyst to remove harmful elements from wastewater.

By

**Dalia I saleh<sup>1</sup>, Samy F. Mahmoud<sup>2</sup> and Safaa Eldin H. Etaiw<sup>3\*</sup>**

<sup>1</sup>Department of chemistry, College of Science, Taif University, P.O. Box 11099, Taif 21944, Saudi Arabia, ORCID ID: <https://orcid.org/0000-0003-1606-6314> E-mail: [dalia.e@tu.edu.sa](mailto:dalia.e@tu.edu.sa)

<sup>2</sup>Department of Biotechnology, College of Science, Taif University, P.O. Box 11099, Taif 21944, Saudi Arabia, ORCID ID: <https://orcid.org/0000-0002-9025-7306> E-mail: [s.farouk@tu.edu.sa](mailto:s.farouk@tu.edu.sa)

<sup>3</sup>Department of Chemistry, Faculty of Science, University of Tanta, 31527-Tanta, Egypt, ORCID ID: <https://orcid.org/0000-0002-9579-3597> E-mail: [safaataiw@hotmail.com](mailto:safaataiw@hotmail.com) & [safaataiw@science.tanta.edu.eg](mailto:safaataiw@science.tanta.edu.eg)

### Supplementary Materials

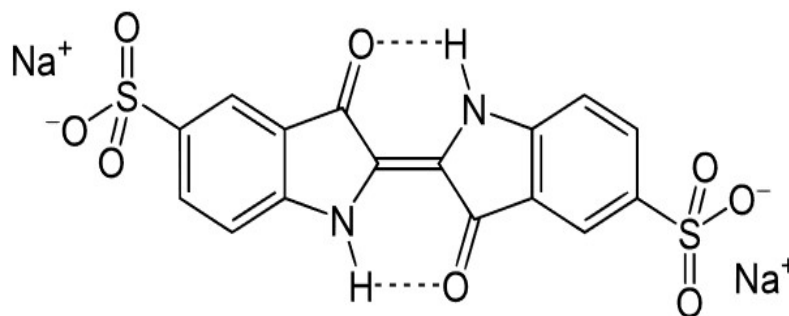

**Scheme S1** Chemical structure of Indigo carmine dye (IC).

**Table S1** The SCP 1's crystal data and structural refinement parameters.

| 1                    |                                                                                 |
|----------------------|---------------------------------------------------------------------------------|
| Empirical Formula    | C <sub>18</sub> H <sub>18</sub> N <sub>4</sub> O <sub>4</sub> S <sub>2</sub> Cd |
| Formula Weight g/mol | 530.894                                                                         |

|                                         |                    |
|-----------------------------------------|--------------------|
| Temperature (K)                         | 298                |
| Crystal system                          | Monoclinic         |
| Space group                             | P2 <sub>1</sub> /c |
| Crystal size                            | 0.51×0.32×0.16 mm  |
| a/Å                                     | 5.7859 (2)         |
| b/Å                                     | 15.7906 (7)        |
| c/Å                                     | 12.0818 (5)        |
| α/°                                     | 90.00              |
| β/°                                     | 95.403 (2)         |
| γ/°                                     | 90.00              |
| V/Å <sup>3</sup>                        | 1098.92 (8)        |
| Z                                       | 2                  |
| μ(Mo-Kα)/m.m <sup>-1</sup>              | 2.14               |
| Calculated density/ mg.cm <sup>-3</sup> | 1.604              |
| Goodness-of-fit on F <sup>2</sup>       | 0.989              |
| F(000)                                  | 532                |
| R indices[I>3σ(I)] R1/wR2               | 0.0390/ 0.1341     |
| R indices(all data)                     | 0.0390/ 0.1068     |
| Data / restraints / parameters          | 4744/0/130         |
| CCDC                                    | 1527036            |

---

**Table S2** Bond lengths (Å) and bond angles (deg.) of the SCP 1.

|                        |            |                                          |             |
|------------------------|------------|------------------------------------------|-------------|
| Cd1—N4 <sup>i</sup>    | 2.318 (2)  | N4 <sup>i</sup> —Cd1—N4 <sup>ii</sup>    | 180.00 (10) |
| Cd1—N4 <sup>ii</sup>   | 2.318 (2)  | N4 <sup>i</sup> —Cd1—N16                 | 89.01 (9)   |
| Cd1—N16                | 2.398 (2)  | N4 <sup>ii</sup> —Cd1—N16                | 90.99 (9)   |
| Cd1—N16 <sup>iii</sup> | 2.398 (2)  | N4 <sup>i</sup> —Cd1—N16 <sup>iii</sup>  | 90.99 (9)   |
| Cd1—S2                 | 2.7291 (8) | N4 <sup>ii</sup> —Cd1—N16 <sup>iii</sup> | 89.01 (9)   |
| Cd1—S2 <sup>iii</sup>  | 2.7291 (8) | N16—Cd1—N16 <sup>iii</sup>               | 180.00 (13) |
| S2—C12                 | 1.6312 (7) | N4 <sup>i</sup> —Cd1—S2                  | 93.65 (7)   |
| C3—N16                 | 1.342 (4)  | N4 <sup>ii</sup> —Cd1—S2                 | 86.35 (7)   |
| Cd1—Cd1 <sup>i</sup>   | 5.786(8)   | N4 <sup>i</sup> —Cd1—S2 <sup>iii</sup>   | 86.35 (7)   |
| Cd1—Cd1 <sup>iii</sup> | 14.554(4)  | N4 <sup>ii</sup> —Cd1—S2 <sup>iii</sup>  | 93.65 (7)   |

Symmetry codes: (i) -x,y,1/2-z; (ii) -x,-y,1-z; (iii) x,-y,z-1/2;

**Table S3** Hydrogen bond lengths (Å) and bond angles (deg) of the SCP 1.

| D-H....A        | d(D-H) | d(H....A) | d(D....A) | ∠(DHA) |
|-----------------|--------|-----------|-----------|--------|
| C9-H9.....S2    | 0.960  | 2.824     | 3.392     | 118.76 |
| C6-H6.....N3    | 0.960  | 2.844     | 3.333     | 112.60 |
| C15-H15A.....N3 | 0.960  | 2.947     | 3.780     | 145.80 |
| C13-H13.....S2  | 0.960  | 3.006     | 3.875     | 151.33 |

|                 |       |        |       |        |
|-----------------|-------|--------|-------|--------|
| C12-H12.....S2  | 0.960 | 3.0541 | 3.733 | 128.97 |
| C15-H15C.....S2 | 0.960 | 3.196  | 4.107 | 159.12 |

---

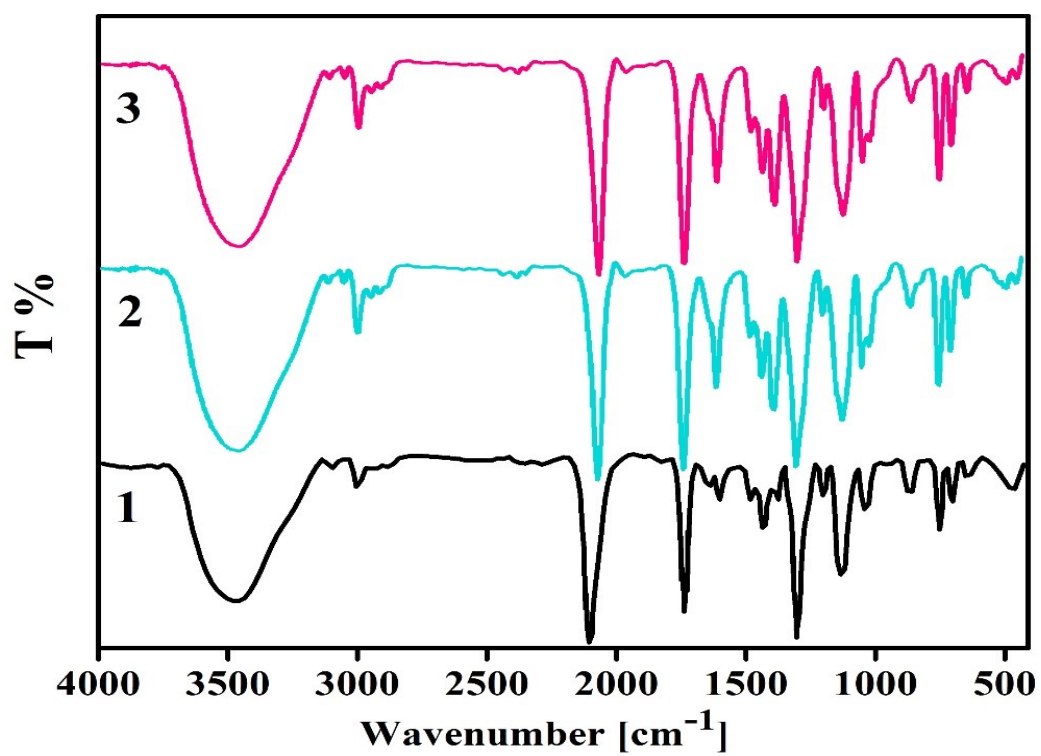

**Figure S 1** IR spectra of SCP1 (1), NSCP1 (2) before, and after catalysis (3).

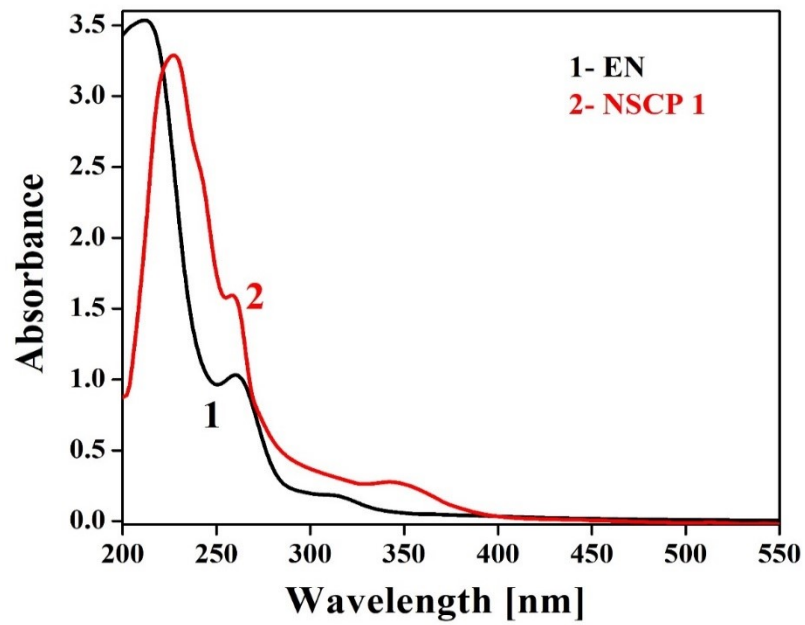

Figure S2 UV-spectra of EN and NSCP1

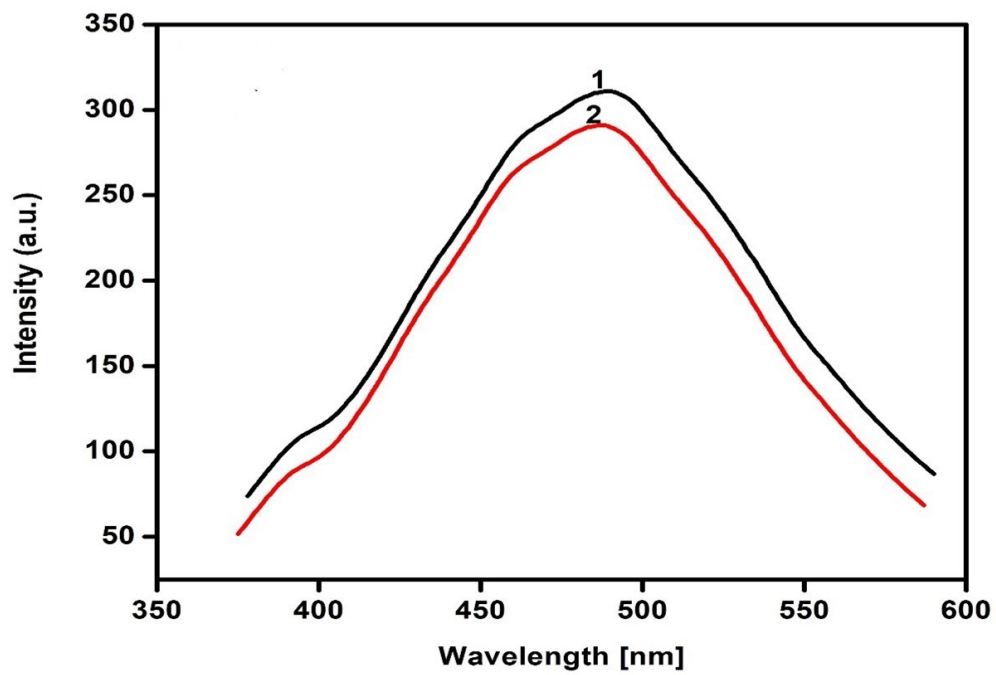

Figure S3 Emission-spectra of (1) SCP1 and (2) NSCP1

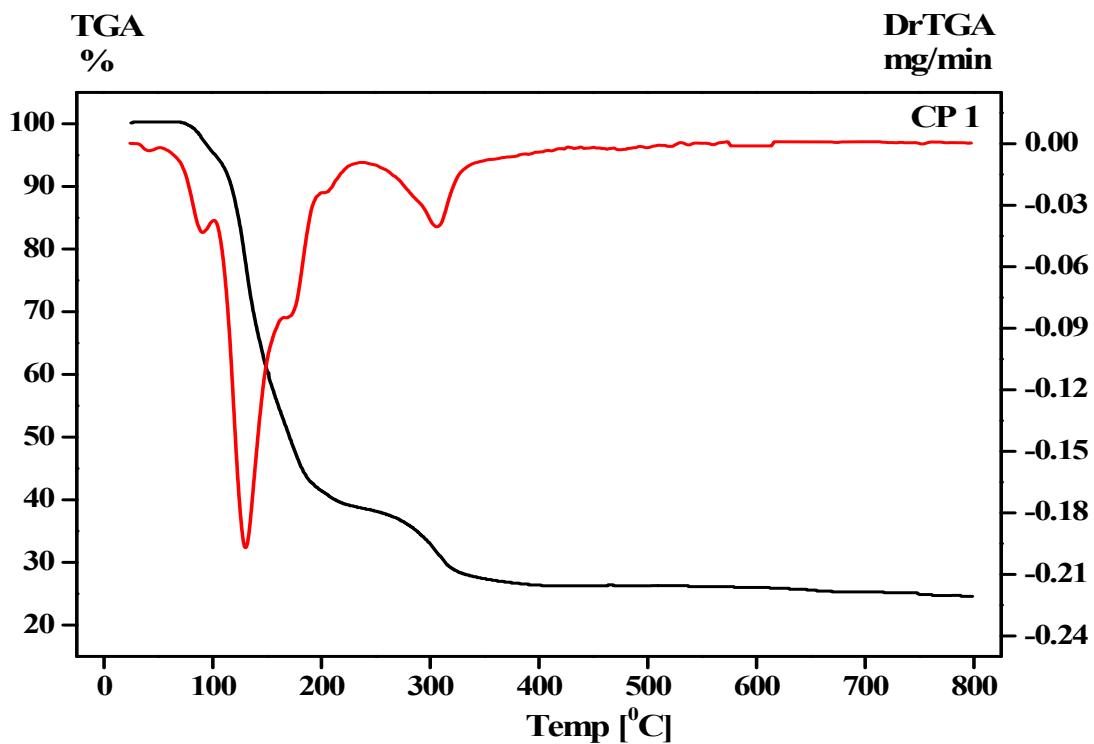

Figure S 4 TGA and DTG thermal analysis curves of the NSCP 1.

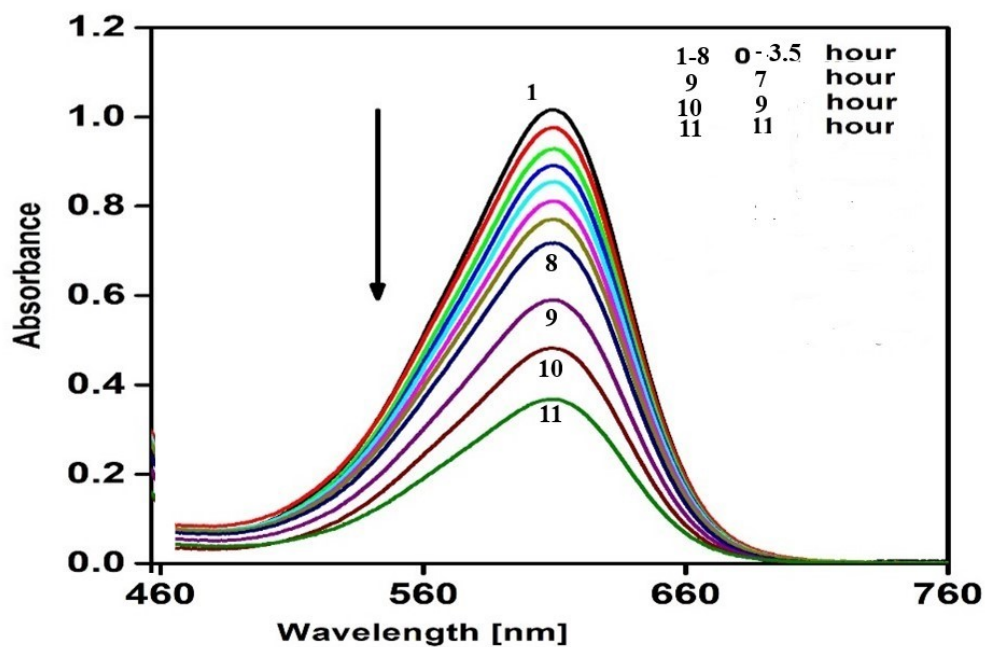

Figure S 5 Control spectra of degradation of the IC dye solution ( $7.0 \times 10^{-5}$  M) under UV-light irradiation.

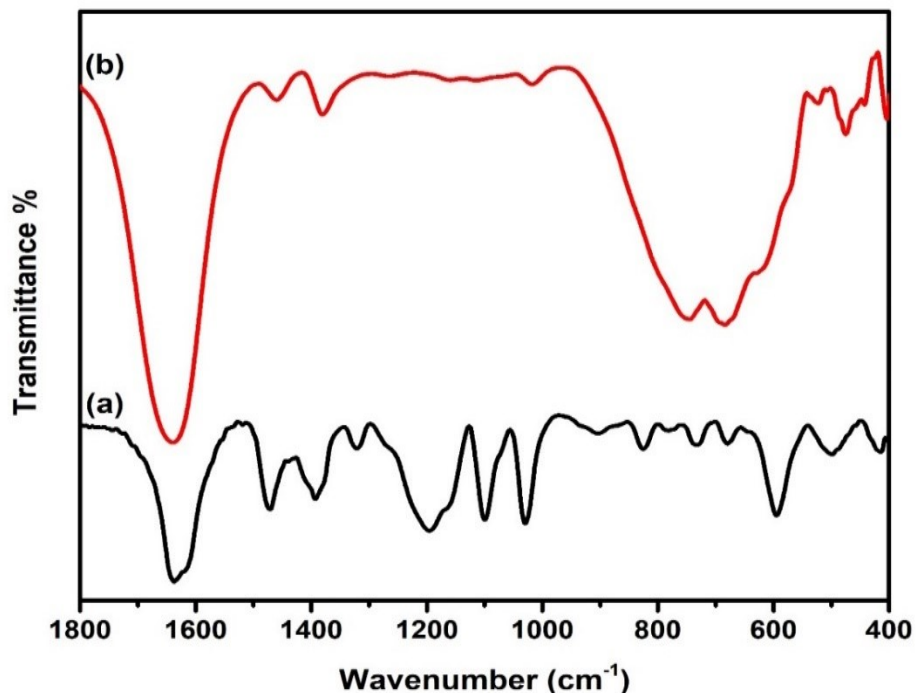

**Figure S6** Indigo carmine dye (IC) infrared spectra (a) prior to and (b) after degradation.

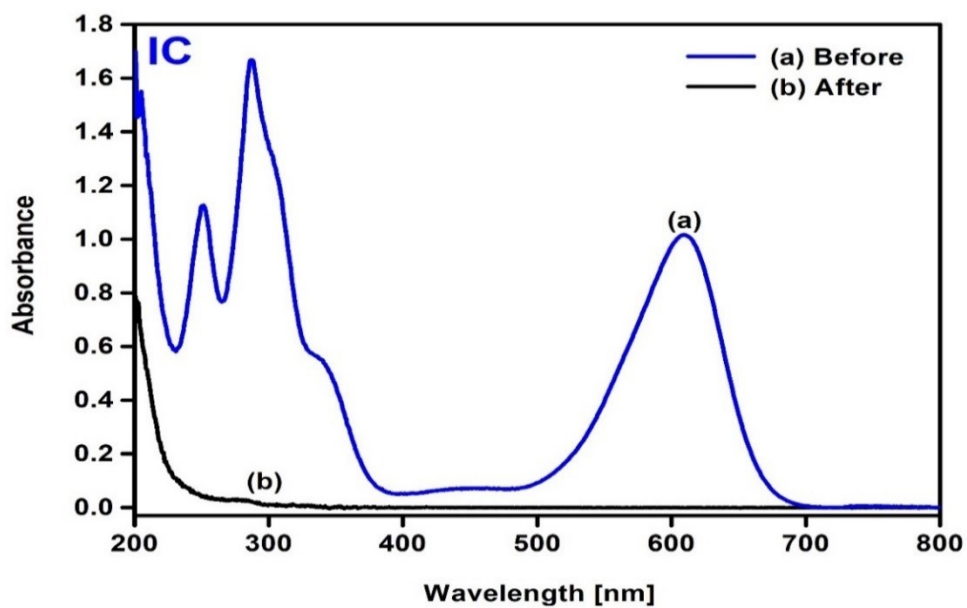

**Figure S7** The electronic absorption spectra of Indigo carmine dye (IC) (a) before and (b) after degradation.

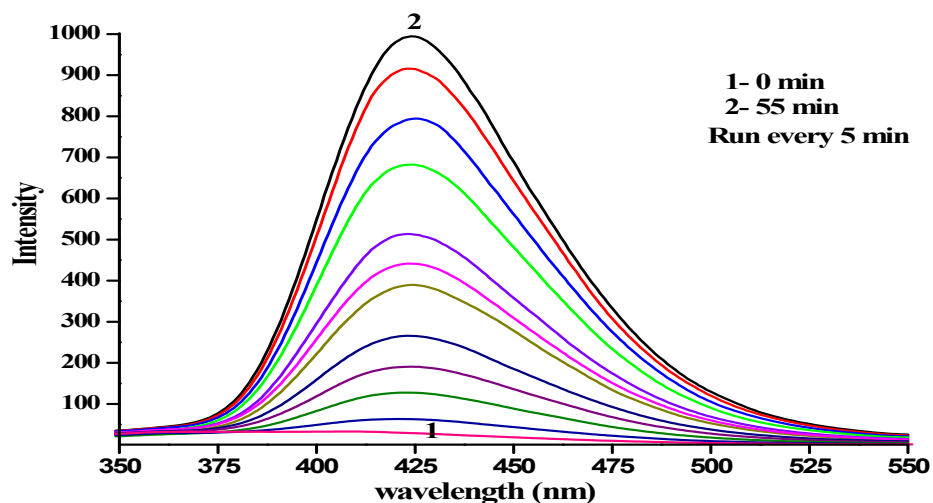

**Figure S8** SCP1 (25 mg), NaTA (0.05 M), and H<sub>2</sub>O<sub>2</sub> (0.1 M) photoluminescence spectra as a function of time.

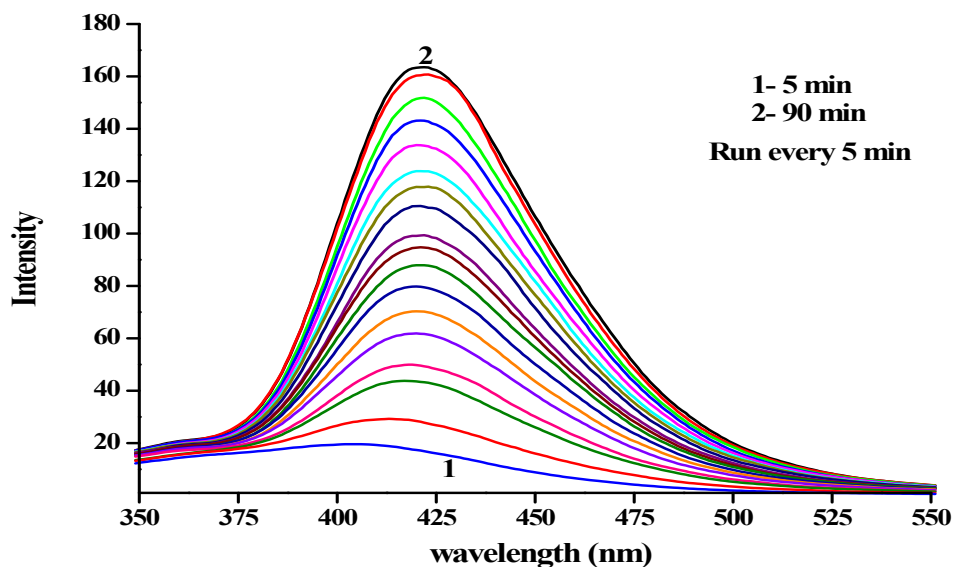

**Figure S9** Photoluminescence spectra of the SCP1 (25 mg), indigo carmin (7.0x10<sup>-5</sup> M), NaTA (0.05 M) and H<sub>2</sub>O<sub>2</sub> (0.1M) as function of time
